# Supplementary material
Source: publisher figshare collection journal article supplement (https://sage.figshare.com/ndownloader/files/15253754)
Supplement: Supplementary file 1 [file 15253754]

\* 1. What is your subspecialty in ENT and what is your grade?

|                                  | Consultant            | SAS                   | ST(3-8)               |
|----------------------------------|-----------------------|-----------------------|-----------------------|
| Otology                          | <input type="radio"/> | <input type="radio"/> | <input type="radio"/> |
| Rhinology                        | <input type="radio"/> | <input type="radio"/> | <input type="radio"/> |
| Paediatric                       | <input type="radio"/> | <input type="radio"/> | <input type="radio"/> |
| Head and Neck                    | <input type="radio"/> | <input type="radio"/> | <input type="radio"/> |
| Laryngology/Benign head and neck | <input type="radio"/> | <input type="radio"/> | <input type="radio"/> |
| General                          | <input type="radio"/> | <input type="radio"/> | <input type="radio"/> |
| Not Applicable                   | <input type="radio"/> | <input type="radio"/> | <input type="radio"/> |

Other (please specify)

\* 2. How often do you use animals/humans-derived products in your practice per month?

- ☐ less than once/month
- ☐ one to 4 times/month
- ☐ more than 4 times/month
- ☐ I don't use animal/human derived products

\* 3. How many years of experience do you have in using animal/human derived products in your surgery?

- ☐ Less than one year
- ☐ 1-5 years
- ☐ 5-10 years
- ☐ More than 10 years
- ☐ I don't use animal/human derived products

\* 4. Are you aware of the animal/human contents of the products listed below and that you routinely or occasionally use or you are aware of?

|                                    | I don't use<br>this product | Human                    | Porcine                  | Bovine                   | I don't know             |
|------------------------------------|-----------------------------|--------------------------|--------------------------|--------------------------|--------------------------|
| Tisseel®                           | <input type="checkbox"/>    | <input type="checkbox"/> | <input type="checkbox"/> | <input type="checkbox"/> | <input type="checkbox"/> |
| Gelfoam®                           | <input type="checkbox"/>    | <input type="checkbox"/> | <input type="checkbox"/> | <input type="checkbox"/> | <input type="checkbox"/> |
| Spongostan®                        | <input type="checkbox"/>    | <input type="checkbox"/> | <input type="checkbox"/> | <input type="checkbox"/> | <input type="checkbox"/> |
| Floseal®                           | <input type="checkbox"/>    | <input type="checkbox"/> | <input type="checkbox"/> | <input type="checkbox"/> | <input type="checkbox"/> |
| Artiss®                            | <input type="checkbox"/>    | <input type="checkbox"/> | <input type="checkbox"/> | <input type="checkbox"/> | <input type="checkbox"/> |
| Demineralised Bone<br>Matrix (DBM) | <input type="checkbox"/>    | <input type="checkbox"/> | <input type="checkbox"/> | <input type="checkbox"/> | <input type="checkbox"/> |
| dCELL Human<br>Dermis®             | <input type="checkbox"/>    | <input type="checkbox"/> | <input type="checkbox"/> | <input type="checkbox"/> | <input type="checkbox"/> |
| Permacol®                          | <input type="checkbox"/>    | <input type="checkbox"/> | <input type="checkbox"/> | <input type="checkbox"/> | <input type="checkbox"/> |
| Evicel®                            | <input type="checkbox"/>    | <input type="checkbox"/> | <input type="checkbox"/> | <input type="checkbox"/> | <input type="checkbox"/> |
| Fibrin Glue®                       | <input type="checkbox"/>    | <input type="checkbox"/> | <input type="checkbox"/> | <input type="checkbox"/> | <input type="checkbox"/> |
| Zyplast®                           | <input type="checkbox"/>    | <input type="checkbox"/> | <input type="checkbox"/> | <input type="checkbox"/> | <input type="checkbox"/> |
| Zyderm®                            | <input type="checkbox"/>    | <input type="checkbox"/> | <input type="checkbox"/> | <input type="checkbox"/> | <input type="checkbox"/> |
| Artefill®                          | <input type="checkbox"/>    | <input type="checkbox"/> | <input type="checkbox"/> | <input type="checkbox"/> | <input type="checkbox"/> |
| Dermalogen®                        | <input type="checkbox"/>    | <input type="checkbox"/> | <input type="checkbox"/> | <input type="checkbox"/> | <input type="checkbox"/> |
| Cymetra®                           | <input type="checkbox"/>    | <input type="checkbox"/> | <input type="checkbox"/> | <input type="checkbox"/> | <input type="checkbox"/> |

\* 5. Do you explain to your patients your intention to use any of these products (please tick which product you would discuss with patient), please indicate the reason.

|                                               | Yes                   | No                    | Dietary<br>(Vegetarian,<br>Vegan) | Religious<br>(Halal/Koscher/Hinduism/Jahovah<br>witness) | Cultural              |
|-----------------------------------------------|-----------------------|-----------------------|-----------------------------------|----------------------------------------------------------|-----------------------|
| Tisseel® (Human)                              | <input type="radio"/> | <input type="radio"/> | <input type="radio"/>             | <input type="radio"/>                                    | <input type="radio"/> |
| Gelfoam® (Porcine)                            | <input type="radio"/> | <input type="radio"/> | <input type="radio"/>             | <input type="radio"/>                                    | <input type="radio"/> |
| Spongostan®<br>(Porcine)                      | <input type="radio"/> | <input type="radio"/> | <input type="radio"/>             | <input type="radio"/>                                    | <input type="radio"/> |
| Floseal®(Bovine and<br>Human)                 | <input type="radio"/> | <input type="radio"/> | <input type="radio"/>             | <input type="radio"/>                                    | <input type="radio"/> |
| Artiss®(Human)                                | <input type="radio"/> | <input type="radio"/> | <input type="radio"/>             | <input type="radio"/>                                    | <input type="radio"/> |
| Demineralised Bone<br>Matrix (DBM)<br>(Human) | <input type="radio"/> | <input type="radio"/> | <input type="radio"/>             | <input type="radio"/>                                    | <input type="radio"/> |
| dCELL Human<br>Dermis® (Human)                | <input type="radio"/> | <input type="radio"/> | <input type="radio"/>             | <input type="radio"/>                                    | <input type="radio"/> |
| Permacol® (Porcine)                           | <input type="radio"/> | <input type="radio"/> | <input type="radio"/>             | <input type="radio"/>                                    | <input type="radio"/> |
| Evicel® (Human)                               | <input type="radio"/> | <input type="radio"/> | <input type="radio"/>             | <input type="radio"/>                                    | <input type="radio"/> |
| Fibrin Glue®<br>(Human)                       | <input type="radio"/> | <input type="radio"/> | <input type="radio"/>             | <input type="radio"/>                                    | <input type="radio"/> |
| Zyplast® (Bovine)                             | <input type="radio"/> | <input type="radio"/> | <input type="radio"/>             | <input type="radio"/>                                    | <input type="radio"/> |
| Zyderm® (Bovine)                              | <input type="radio"/> | <input type="radio"/> | <input type="radio"/>             | <input type="radio"/>                                    | <input type="radio"/> |
| Artefill® (Bovine)                            | <input type="radio"/> | <input type="radio"/> | <input type="radio"/>             | <input type="radio"/>                                    | <input type="radio"/> |
| Dermalogen®<br>(Human)                        | <input type="radio"/> | <input type="radio"/> | <input type="radio"/>             | <input type="radio"/>                                    | <input type="radio"/> |
| Cymetra® (Human)                              | <input type="radio"/> | <input type="radio"/> | <input type="radio"/>             | <input type="radio"/>                                    | <input type="radio"/> |

Other (please specify)

\* 6. Would you be guided by a patient appearance, dress, ethnic or cultural background, or documented religion with regards to discussing with them your intention to use any of the aforementioned products?

|                     | Yes                   | No                    | In certain circumstances (please use the box below to specify) |
|---------------------|-----------------------|-----------------------|----------------------------------------------------------------|
| Appearance          | <input type="radio"/> | <input type="radio"/> | <input type="radio"/>                                          |
| Dress               | <input type="radio"/> | <input type="radio"/> | <input type="radio"/>                                          |
| Ethnic              | <input type="radio"/> | <input type="radio"/> | <input type="radio"/>                                          |
| Cultural background | <input type="radio"/> | <input type="radio"/> | <input type="radio"/>                                          |
| Documented religion | <input type="radio"/> | <input type="radio"/> | <input type="radio"/>                                          |

Please specify:

\* 7. Would you consider changing your surgical plans based on what materials you can or can't use (as indicated by patient)?

- ☐ Yes
- ☐ No

\* 8. Would you restrict the use of certain products because of: the religion you follow, the culture you are from, or a diet that you adhere to?

|          | Yes                   | No                    |
|----------|-----------------------|-----------------------|
| Religion | <input type="radio"/> | <input type="radio"/> |
| Culture  | <input type="radio"/> | <input type="radio"/> |
| Diet     | <input type="radio"/> | <input type="radio"/> |

Other (please specify)

\* 9. Would you avoid certain materials in your patients based on your own religious/cultural/dietary beliefs?

- ☐ Yes
- ☐ No

\* 10. After answering this questionnaire, would you mention certain materials in your consenting process?

- ☐ Yes
- ☐ No

11. Please use the text box below to add any comments/suggestions.
